# Supplementary material for: Elevated efficiency and stability of hole-transport-layer-free perovskite solar cells induced by phenethylammonium iodide
Source: Royal Society of Chemistry journal article supplement (doi:10.1039/d3ta07077h), 2023-12-06
Supplement: d3ta07077h1.pdf [file d3ta07077h1.pdf]

## Supporting information

### **Elevated efficiency and stability of hole-transport-layer-free perovskite solar cells induced by phenethylammonium iodide**

Qingbo Wei<sup>1\*</sup>, Zhangwen Ye<sup>1</sup>, Yixuan Gao<sup>1</sup>, Nannan Wang<sup>1</sup>, Lina Feng<sup>1</sup>, Qingxia Zhao<sup>1</sup>, Xiufang Hou<sup>1</sup>, Lingxing Zan<sup>1</sup>, Feng Fu<sup>1\*</sup>, Dong Yang<sup>2\*</sup>

<sup>1</sup> Key Laboratory of Chemical Reaction Engineering of Shaanxi Province, College of Chemistry & Chemical Engineering, Yan'an University, Yan'an 716000, China

<sup>2</sup> Dalian National Laboratory for Clean Energy, Dalian Institute of Chemical Physics, Chinese Academy of Sciences, Dalian, Liaoning, 116023, China

\*Corresponding authors

E-mail addresses: qbwei@yau.edu.cn; fufeng@yau.edu.cn; dongyang@dicp.ac.cn

### **Materials**

Methylamine iodine (MAI), lead iodide (PbI<sub>2</sub>), phenylethyl amine iodide (PEAI), carbon slurry, and indium-doped tin oxide (ITO) glasses were obtained from Advanced Electronic Technology Co, Ltd., Yingkou, China. *N, N*-dimethylformamide (DMF), dimethyl sulfoxide (DMSO), and chlorobenzene were ordered from Sinopharm Chemical Reagent Co. Ltd. Isopropanol (IPA) was purchased from Sigma-Aldrich Technology Co., Ltd.

### **Device fabrication**

ITO glasses were ultrasonically cleaned with ethanol and treated with UV-ozone for 15 min. To obtain a compact SnO<sub>2</sub> film, a SnCl<sub>4</sub>·5H<sub>2</sub>O solution precursor was spin-coated on ITO glasses at 3000 rpm for 30 s, and then annealed at 180 °C for 60 min. The precursor perovskite film was made by mixing DMF:DMSO

( $V_{\text{DMF}}:V_{\text{DMSO}}=9:1$ ) containing 0.599 g of  $\text{PbI}_2$ , 0.159 g of MAI, and 300  $\mu\text{L}$  of ethyl acetate and then allowing the mixture to drop within 30 s at 3000 rpm. The samples were annealed at  $100^\circ\text{C}$  for 10 min. Afterward, the PEAI was spin-coated on the perovskite film at a speed of 5000 rpm for 30 s. The carbon electrode was scraped on the perovskite film with an active area of  $0.07\text{ cm}^2$  and dried for 6 h without any further treatment.

### **Measurements and characterization**

X-ray diffraction (XRD) measurements were carried out on a DX-2700 diffractometer (Bruker Corp., Germany) using Cu K radiation ( $0.154181\text{ nm}$ ) at 40 kV and 30 mA. PIXEA-CU-1 (AUREA, France) with an  $\text{Ar}^+$  excitation light source and an excitation wavelength of  $532\text{ nm}$  was used to measure steady-state photoluminescence (PL) and time-resolved photoluminescence (TRPL). A PerkinElmer Lambda spectroscopy (950UV/VIS/NIR) was adopted to record UV-vis absorption spectra. The surface morphology was observed on a 7610F scanning electron microscope (SEM, JOEL, Japan). Photocurrent density-voltage (J-V) curves of the perovskite solar cells were measured under AM 1.5G at  $100\text{ mW cm}^{-2}$  using a solar simulator and NREL traceable Si solar cell.

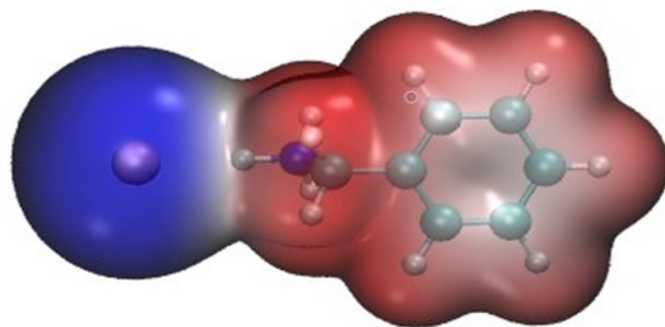

**Figure S1.** The electrostatic potential surface image of PEAI molecule.

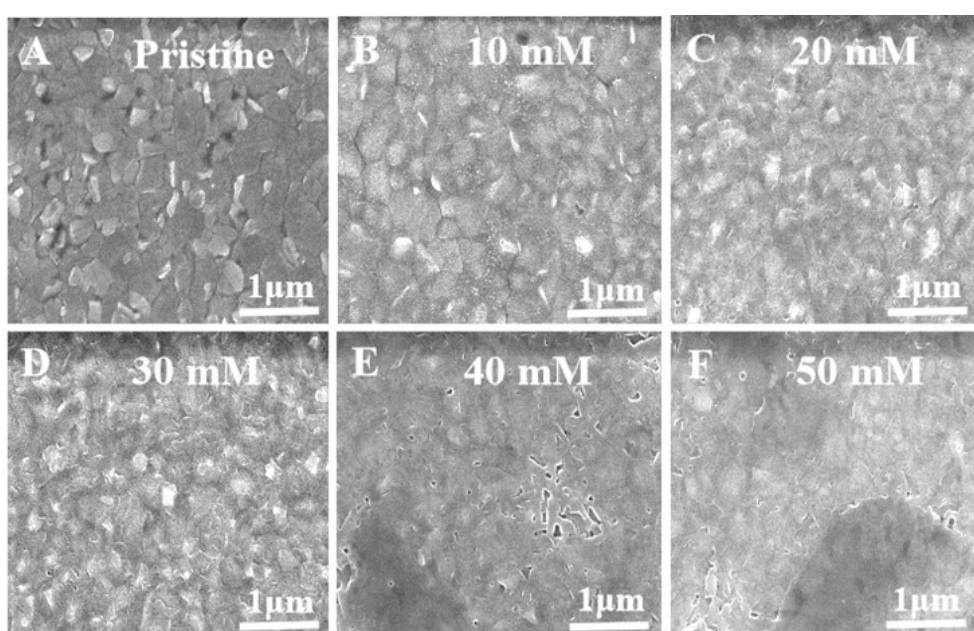

**Figure S2.** SEM images of the perovskite films treated by PEAI with different concentrations.

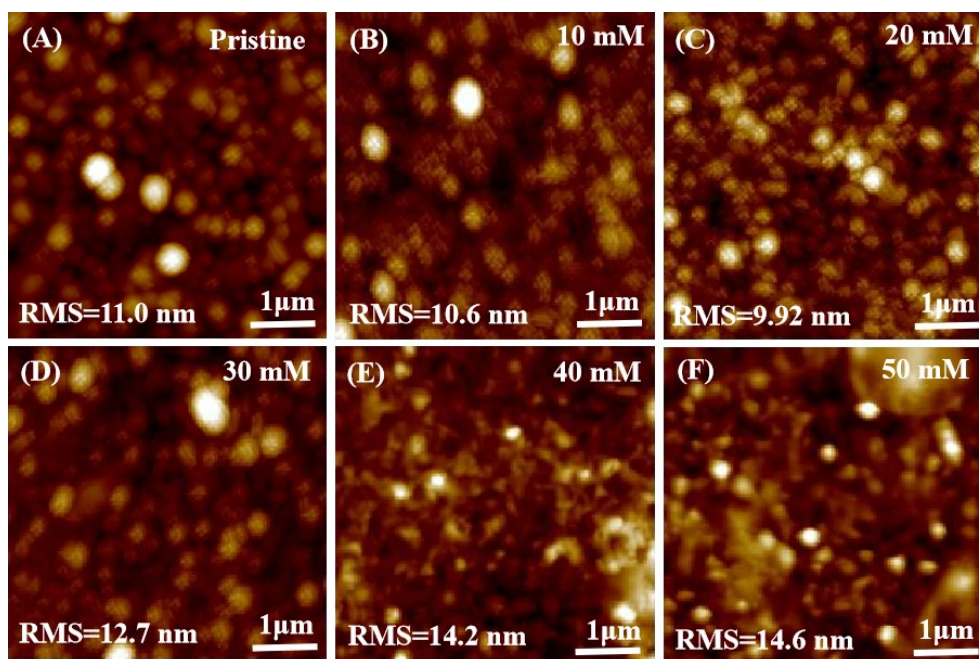

**Figure S3.** AFM images of the perovskite films treated by PEAI with different concentrations.

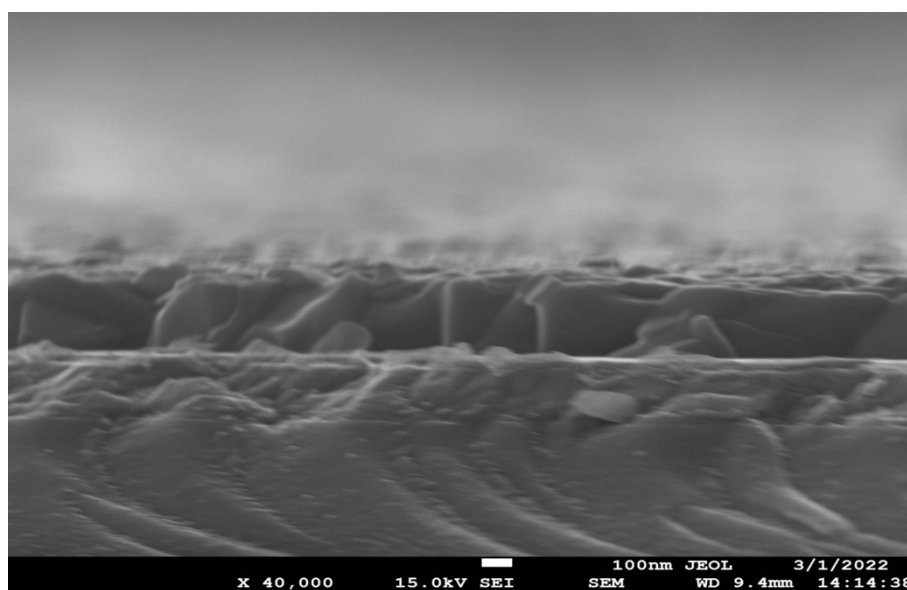

**Figure S4.** Cross-sectional SEM image of perovskite films treated by 10 mM.

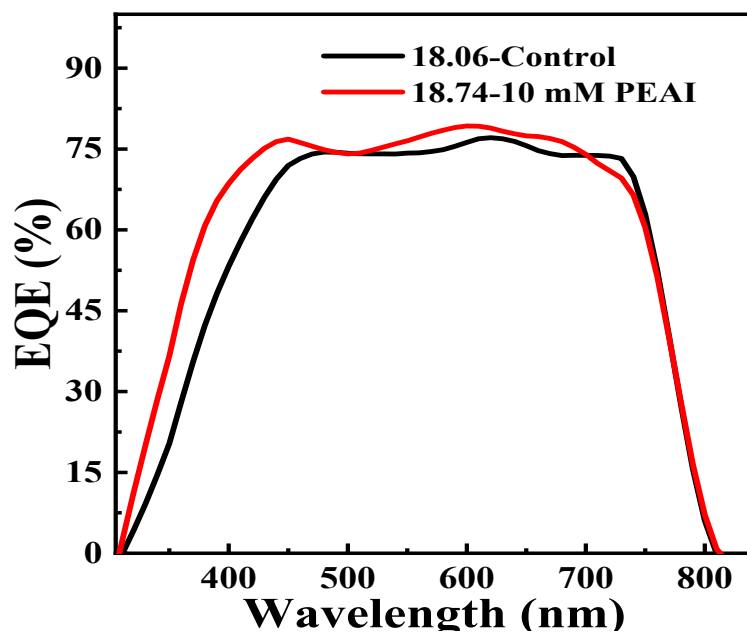

Figure S5. EQE data of the perovskite devices with and without PEAI treatment.

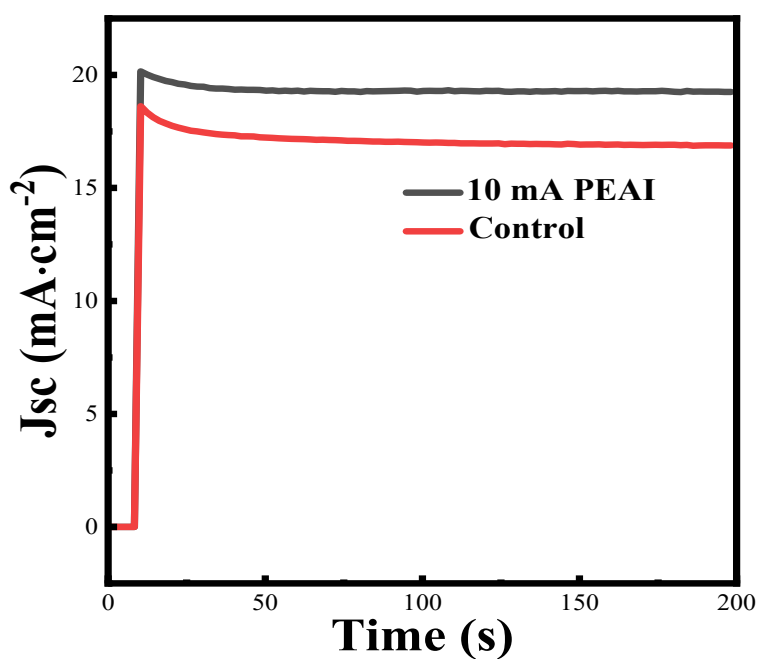

Figure S6. Maximal steady-state power output at the maximum power point for the PSCs prepared with and without PEAI treated at 0.7V.

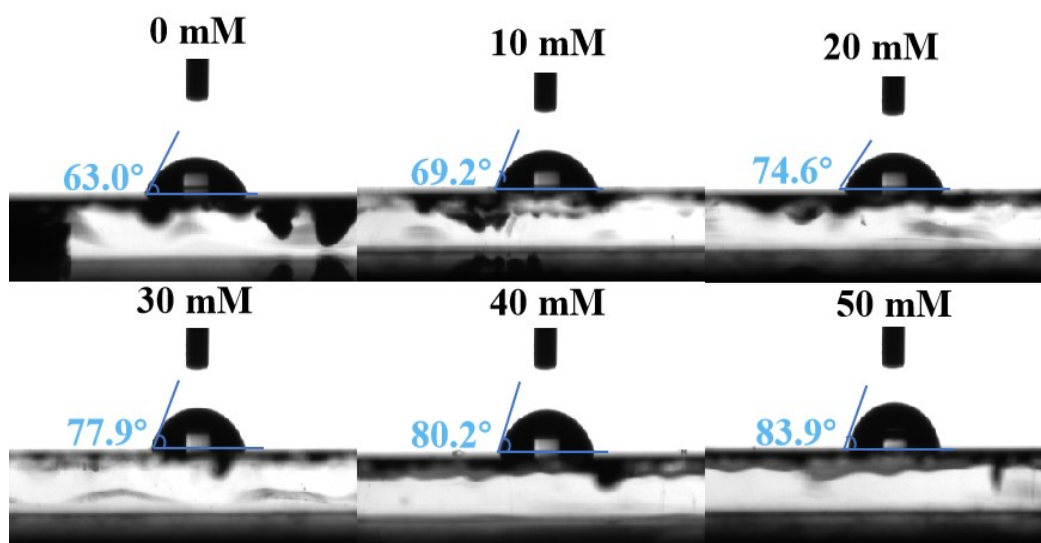

**Figure S7.** Water contact angle of the perovskite films treated by PEAI with different concentrations.

**Table S1.** Device parameters for 20 cycles under the optimum concentration.

| Cycle index | $V_{oc}$ (V) | $J_{sc}$ (mA cm <sup>-2</sup> ) | FF (%) | PCE (%) |
|-------------|--------------|---------------------------------|--------|---------|
| 1           | 1.17         | 19.57                           | 68.19  | 15.67   |
| 2           | 1.17         | 19.54                           | 68.51  | 15.72   |
| 3           | 1.17         | 19.56                           | 68.13  | 15.64   |
| 4           | 1.17         | 19.57                           | 68.21  | 15.65   |
| 5           | 1.17         | 19.55                           | 68.32  | 15.64   |
| 6           | 1.17         | 19.52                           | 68.18  | 15.57   |
| 7           | 1.17         | 19.51                           | 68.04  | 15.52   |
| 8           | 1.17         | 19.54                           | 68.00  | 15.52   |
| 9           | 1.17         | 19.55                           | 67.80  | 15.47   |
| 10          | 1.17         | 19.54                           | 67.74  | 15.44   |
| 11          | 1.17         | 19.52                           | 67.67  | 15.40   |
| 12          | 1.16         | 19.51                           | 67.53  | 15.36   |
| 13          | 1.16         | 19.55                           | 67.50  | 15.39   |
| 14          | 1.16         | 19.53                           | 67.32  | 15.32   |
| 15          | 1.16         | 19.54                           | 67.18  | 15.29   |
| 16          | 1.16         | 19.52                           | 67.21  | 15.29   |
| 17          | 1.16         | 19.51                           | 67.13  | 15.25   |
| 18          | 1.16         | 19.51                           | 66.95  | 15.21   |
| 19          | 1.16         | 19.50                           | 66.90  | 15.20   |
| 20          | 1.16         | 19.50                           | 66.84  | 15.17   |

**Table S2.** Device parameters under various scan voltages at the optimum concentration.

| Bias voltage (V) | V <sub>oc</sub> (V) | J <sub>sc</sub> (mA cm <sup>-2</sup> ) | FF (%) | PCE (%) |
|------------------|---------------------|----------------------------------------|--------|---------|
| 1.2              | 1.18                | 19.93                                  | 63.35  | 14.84   |
| 1.4              | 1.17                | 19.94                                  | 63.94  | 14.98   |
| 1.6              | 1.17                | 19.93                                  | 64.28  | 15.03   |
| 1.8              | 1.17                | 19.97                                  | 64.85  | 15.20   |
| 2.0              | 1.17                | 19.96                                  | 65.07  | 15.22   |
| 2.2              | 1.17                | 19.93                                  | 65.33  | 15.23   |
| 2.4              | 1.17                | 19.89                                  | 65.66  | 15.27   |
| 2.6              | 1.16                | 19.87                                  | 65.78  | 15.23   |
| 2.8              | 1.16                | 19.80                                  | 65.39  | 15.06   |
| 3.0              | 1.16                | 19.77                                  | 65.20  | 14.96   |
